# Supplementary material for: A cathodic electrogenerated chemiluminescence biosensor based on luminol and hemin-graphene nanosheets for cholesterol detection
Source: Royal Society of Chemistry journal article supplement (doi:10.1039/c2ra20374j), 2012-01-01
Supplement: c2ra20374j.pdf [file c2ra20374j.pdf]

## **A cathodic electrogenerated chemiluminescence biosensor based on luminol and hemin-graphene nanosheets for cholesterol detection**

Meihe Zhang, Ruo Yuan\*, Yaqin Chai, Shihong Chen, Xia Zhong, Huaan Zhong, Cun Wang

*Education Ministry Key Laboratory on Luminescence and Real-Time Analysis,*

*College of Chemistry and Chemical Engineering, Southwest University, Chongqing*

*400715, PR China*

**Materials:** Graphene oxide was purchased from Nanjing xianfeng nano Co. (Nanjing, China). Hemin, cholesterol oxidase (ChOx, EC 1.1.3.6,  $\geq 50$  units/mg, from *Brevibacterium* sp.), cholesterol ( $C_{27}H_{46}O$ ,  $M_r$ : 386.67,  $\geq 99\%$  purity, from lanolin), and Triton X-100 ( $C_{34}H_{62}O_{11}$ , MW: 646.85) were obtained from Sigma Chemical Co. (St. Louis, MO, USA). Phosphate buffer solutions (PBS, containing 0.9% NaCl) with pH 7.4 were prepared with 0.05 M  $KH_2PO_4$  and 0.05 M  $Na_2HPO_4$ . The stock solution was prepared by dissolving cholesterol in the mixture of 2-propanol and Triton X-100, and then diluted it only with Triton X-100 solution for preparing standard solutions. Other chemicals used were of analytical grade and were used as received. Double distilled water was used throughout this study.

**Apparatus and measurements:** Cyclic voltammetry (CV) was performed with a CHI 600D electrochemical work station (Shanghai Chenhua Instruments Co., China). The ECL emission was monitored with a model MPI-A electrochemiluminescence analyzer (Xi'an Remax Electronic Science & Technology Co. Ltd., China) with the

voltage of the photomultiplier tube (PMT) set at 600 V in the process of detection. All experiments were performed with a conventional three-electrode system. The modified glassy carbon electrode (GCE) as working electrode, a platinum wire as counter electrode and a saturated calomel electrode (SCE) or Ag/AgCl (sat. KCl) as reference electrode. The UV-Vis absorption spectra were recorded in the range of 200-800 nm, using a UV-Vis spectrometer (UV-Vis 8500). All the electrochemical experiments were carried out at room temperature.

**Preparation of hemin-graphene nanosheets:** According to Guo's work<sup>1</sup>, hemin-graphene nanosheets (H-GNs) were synthesized with a simple wet-chemical strategy through the  $\pi$ - $\pi$  interactions. First, 20.0 mL of the homogeneous graphene oxide dispersion (0.5 mg/mL) was mixed with 20.0 mL of 0.5 mg/mL hemin aqueous solution and 200.0  $\mu$ L of ammonia solution, followed by the addition of 30  $\mu$ L of hydrazine solution. After being vigorously stirred for a few minutes, the vial was put in a water bath (60 °C) for 3.5 h. Finally, the product was obtained by filtration and washed several times. The obtained H-GNs can be redispersed readily in water by ultrasonication. Additionally, the preparation of pure graphene was similar to H-GNs except no addition of hemin.

**Construction of the cholesterol biosensor:** Glassy carbon electrode (GCE,  $\Phi = 4$  mm) was polished with 0.3 and 0.05  $\mu$ m alumina slurry, and then ultrasonically cleaned in ethanol and water thoroughly. After it was allowed to dry at room temperature, 10  $\mu$ L H-GNs dispersed solution was dropped on the GCE. Subsequently, 5  $\mu$ L ChOx (1 mg/mL in 0.1 M PBS, pH 7.0) solutions were dropped on the surface of

the electrode to construct a cholesterol biosensor (noted as ChOx/H-GNs/GCE). For comparison, ChOx/GNs/GCE was prepared similarly. The modified electrodes were stored at 4 °C for future use.

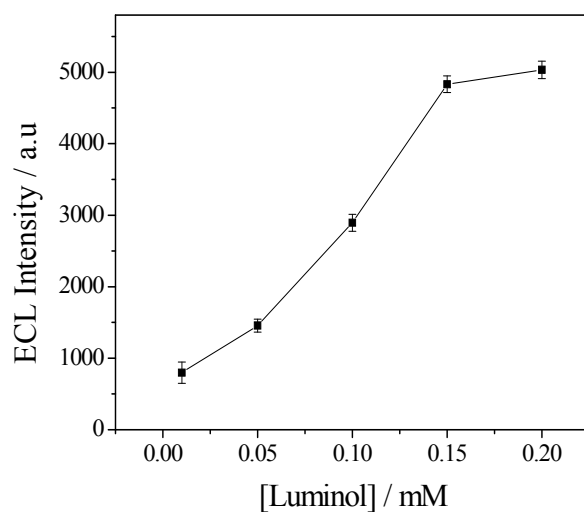

**Fig. S1** Effect of luminol concentration on the ECL responses to cholesterol at ChOx/H-GNs/GCE in 0.05 M PBS (pH 7.4). Scan rate: 100 mV/s.

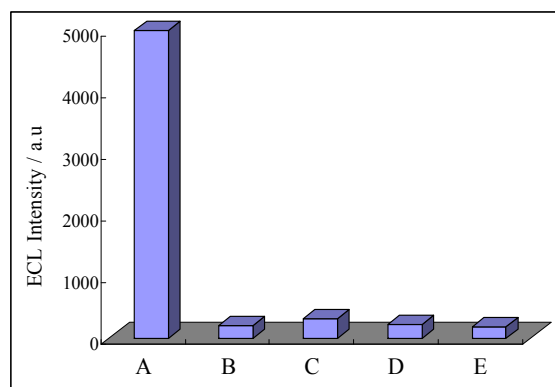

**Fig. S2** The ECL responses of luminol (0.15 mM) at ChOx/H-GNs/GCE to (A) 0.38 mM cholesterol, (B) 2 mM ascorbic acid, (C) 2 mM uric acid, (D) 2 mM dopamine, and (E) 2 mM glycine in 0.05 M PBS (pH 7.4). Scan rate: 100 mV/s.

**Table S1** Comparison of performance of some cholesterol sensors

| Electrode materials                   | Determine method               | Linear range ( $\mu\text{M}$ ) | Detection limit ( $\mu\text{M}$ ) | Refs.     |
|---------------------------------------|--------------------------------|--------------------------------|-----------------------------------|-----------|
| ChOx/Chi-IL/MWNT(SH)-Au               | Chronoampertry                 | 500-5000                       | —                                 | 2         |
| ChOx-PPy/Pt                           | Chronoampertry                 | 25-300                         | 5.7                               | 3         |
| Gold electrode polymerized with 2-MBI | Molecularly imprinted polymers | 5-30                           | 0.42                              | 4         |
| ChOx/p(pyrrole)/p(HEMA)               | Chronoampertry                 | 500-1500                       | 120                               | 5         |
| ChOx/H-GNs/GCE                        | ECL                            | 0.17-1120                      | 0.06                              | This work |

ChOx, cholesterol oxidase. Chi, chitosan. IL, ionic liquid. MWNTs, multiwall carbon nanotubes. PPy, polypyrrole. MBI, maslach burnout inventory. p(HEMA), poly(2-hydroxyethyl methacrylate).

**Table S2.** Application of the biosensor for determination the recovery of cholesterol.

| Sample | Detected <sup>a</sup> ( $\mu\text{M}$ ) | Added ( $\mu\text{M}$ ) | Found <sup>a</sup> ( $\mu\text{M}$ ) | Recovery (%) |
|--------|-----------------------------------------|-------------------------|--------------------------------------|--------------|
| 1      | 10.0                                    | 10.0                    | 20.5 $\pm$ 0.8                       | 102.5        |
| 2      | 10.0                                    | 15.0                    | 25.7 $\pm$ 1.5                       | 102.8        |
| 3      | 15.0                                    | 25.0                    | 44.8 $\pm$ 1.8                       | 112.0        |
| 4      | 75.0                                    | 75.0                    | 150.8 $\pm$ 2.0                      | 100.5        |
| 5      | 150.0                                   | 200.0                   | 345.1 $\pm$ 0.9                      | 98.6         |
| 6      | 300.0                                   | 400.0                   | 699.4 $\pm$ 0.6                      | 99.9         |

All samples were analyzed using standard addition method (n = 3).

<sup>a</sup> Mean value  $\pm$  standard deviation (n = 3).

## References

1. Y.J. Guo, L. Deng, L. Li, S.J. Guo, E.K. Wang, S.J. Dong, *ACS Nano*, 2011, 5, 1282–1290.
2. A.L. Gopalan, K.P. Lee, D. Ragupathy, *Biosens. Bioelectron.*, 2009, 24, 2211–2217.
3. J.C. Vidal, E. Garcia, J.R. Castillo, *Anal. Chim. Acta.*, 1999, 385, 213–222.
4. A. Aghaei, M.R.M. Hosseini, M. Najafi, *Electrochim. Acta.*, 2010, 55, 1503–1508.
5. S. Brahim, D. Narinesingh, A. Guiseppi-Elie, *Anal. Chim. Acta.*, 2001, 448, 27–36.
